# Supplementary material
Source: publisher figshare collection journal article supplement (https://acs.figshare.com/ndownloader/files/4528813)
Supplement: Supplementary file 1 [file 4528813]

 
data_1 
 
_audit_creation_method            SHELXL-97 
_chemical_name_systematic 
; 
 ? 
; 
_chemical_name_common             ? 
_chemical_melting_point           ? 
_chemical_formula_moiety          ? 
_chemical_formula_sum 
 'C13 H15 D2 N6 O6.50' 
_chemical_formula_weight          363.34 
 
loop_ 
 _atom_type_symbol 
 _atom_type_description 
 _atom_type_scat_dispersion_real 
 _atom_type_scat_dispersion_imag 
 _atom_type_scat_source 
 'C'  'C'   0.0033   0.0016 
 'International Tables Vol C Tables 4.2.6.8 and 6.1.1.4' 
 'H'  'H'   0.0000   0.0000 
 'International Tables Vol C Tables 4.2.6.8 and 6.1.1.4' 
 'N'  'N'   0.0061   0.0033 
 'International Tables Vol C Tables 4.2.6.8 and 6.1.1.4' 
 'O'  'O'   0.0106   0.0060 
 'International Tables Vol C Tables 4.2.6.8 and 6.1.1.4' 
 'D'  'D'   0.0000   0.0000 
 'International Tables Vol C Tables 4.2.6.8 and 6.1.1.4' 
 
_symmetry_cell_setting            triclinic
_symmetry_space_group_name_H-M    'p-1' 
 
loop_ 
 _symmetry_equiv_pos_as_xyz 
 'x, y, z' 
 '-x, -y, -z' 
 
_cell_length_a                    6.951(2) 
_cell_length_b                    10.718(4) 
_cell_length_c                    11.123(4) 
_cell_angle_alpha                 102.48(2) 
_cell_angle_beta                  98.378(17) 
_cell_angle_gamma                 105.812(13) 
_cell_volume                      759.7(5) 
_cell_formula_units_Z             2 
_cell_measurement_temperature     293(2) 
_cell_measurement_reflns_used     ? 
_cell_measurement_theta_min       ? 
_cell_measurement_theta_max       ? 
 
_exptl_crystal_description        ? 
_exptl_crystal_colour             ? 
_exptl_crystal_size_max                 0.5300
_exptl_crystal_size_mid                 0.2400
_exptl_crystal_size_min                 0.2300
_exptl_crystal_density_meas       ? 
_exptl_crystal_density_diffrn     1.588 
_exptl_crystal_density_method     'not measured' 
_exptl_crystal_F_000              378 
_exptl_absorpt_coefficient_mu     0.129 
_exptl_absorpt_correction_type    multi-scan
_exptl_absorpt_correction_T_min   0.8332
_exptl_absorpt_correction_T_max   1.0000
_exptl_absorpt_process_details    ? 
 
_exptl_special_details 
; 
 ? 
; 
 
_diffrn_ambient_temperature       293(2) 
_diffrn_radiation_wavelength      0.71073 
_diffrn_radiation_type            MoK\a 
_diffrn_radiation_source          'fine-focus sealed tube' 
_diffrn_radiation_monochromator   graphite 
_diffrn_measurement_device_type   ? 
_diffrn_measurement_method        ? 
_diffrn_detector_area_resol_mean  ? 
_diffrn_standards_number          ? 
_diffrn_standards_interval_count  ? 
_diffrn_standards_interval_time   ? 
_diffrn_standards_decay_%         ? 
_diffrn_reflns_number             6473 
_diffrn_reflns_av_R_equivalents   0.0818 
_diffrn_reflns_av_sigmaI/netI     0.1540 
_diffrn_reflns_limit_h_min        -9 
_diffrn_reflns_limit_h_max        9 
_diffrn_reflns_limit_k_min        -13 
_diffrn_reflns_limit_k_max        13 
_diffrn_reflns_limit_l_min        -12 
_diffrn_reflns_limit_l_max        14 
_diffrn_reflns_theta_min          2.05 
_diffrn_reflns_theta_max          27.47 
_reflns_number_total              3393 
_reflns_number_gt                 1808 
_reflns_threshold_expression      >2sigma(I) 
 
_computing_data_collection        ? 
_computing_cell_refinement        ? 
_computing_data_reduction         ? 
_computing_structure_solution     'SHELXS-97 (Sheldrick, 1990)' 
_computing_structure_refinement   'SHELXL-97 (Sheldrick, 1997)' 
_computing_molecular_graphics     ? 
_computing_publication_material   ? 
 
_refine_special_details 
; 
 Refinement of F^2^ against ALL reflections.  The weighted R-factor wR and 
 goodness of fit S are based on F^2^, conventional R-factors R are based 
 on F, with F set to zero for negative F^2^. The threshold expression of 
 F^2^ > 2sigma(F^2^) is used only for calculating R-factors(gt) etc. and is 
 not relevant to the choice of reflections for refinement.  R-factors based 
 on F^2^ are statistically about twice as large as those based on F, and R- 
 factors based on ALL data will be even larger. 
; 
 
_refine_ls_structure_factor_coef  Fsqd  
_refine_ls_matrix_type            full 
_refine_ls_weighting_scheme       calc  
_refine_ls_weighting_details 
 'calc w=1/[\s^2^(Fo^2^)+(0.1445P)^2^+0.0000P] where P=(Fo^2^+2Fc^2^)/3' 
_atom_sites_solution_primary      direct 
_atom_sites_solution_secondary    difmap 
_atom_sites_solution_hydrogens    geom 
_refine_ls_hydrogen_treatment     mixed 
_refine_ls_extinction_method      none 
_refine_ls_extinction_coef        ? 
_refine_ls_number_reflns          3393 
_refine_ls_number_parameters      243 
_refine_ls_number_restraints      333 
_refine_ls_R_factor_all           0.1057 
_refine_ls_R_factor_gt            0.0805 
_refine_ls_wR_factor_ref          0.2663 
_refine_ls_wR_factor_gt           0.2034 
_refine_ls_goodness_of_fit_ref    0.940 
_refine_ls_restrained_S_all       0.895 
_refine_ls_shift/su_max           0.000 
_refine_ls_shift/su_mean          0.000 
 
loop_ 
 _atom_site_label 
 _atom_site_type_symbol 
 _atom_site_fract_x 
 _atom_site_fract_y 
 _atom_site_fract_z 
 _atom_site_U_iso_or_equiv 
 _atom_site_adp_type 
 _atom_site_occupancy 
 _atom_site_symmetry_multiplicity 
 _atom_site_calc_flag 
 _atom_site_refinement_flags 
 _atom_site_disorder_assembly 
 _atom_site_disorder_group 
C1 C 1.0583(5) 0.8190(3) 0.7479(3) 0.0184(7) Uani 1 1 d U . . 
C2 C 0.9168(5) 0.9052(3) 0.7531(3) 0.0159(7) Uani 1 1 d U . . 
C3 C 0.9744(5) 1.0295(3) 0.8441(3) 0.0174(7) Uani 1 1 d U . . 
H3A H 1.1027(5) 1.0611(3) 0.9043(3) 0.021 Uiso 1 1 d RU . . 
C4 C 0.8404(5) 1.1050(3) 0.8444(3) 0.0179(7) Uani 1 1 d U . . 
N5 N 0.9004(5) 1.2356(3) 0.9399(3) 0.0243(7) Uani 1 1 d U . . 
C6 C 0.6550(5) 1.0653(3) 0.7613(4) 0.0189(8) Uani 1 1 d U . . 
H6A H 0.5658(5) 1.1197(3) 0.7638(4) 0.023 Uiso 1 1 d RU . . 
C7 C 0.6044(5) 0.9423(3) 0.6736(3) 0.0154(7) Uani 1 1 d U . . 
N6 N 0.4070(4) 0.8960(3) 0.5818(3) 0.0193(7) Uani 1 1 d U . . 
C9 C 0.7285(5) 0.8609(3) 0.6670(3) 0.0150(7) Uani 1 1 d U . . 
H9A H 0.6868(5) 0.7756(3) 0.6050(3) 0.018 Uiso 1 1 d RU . . 
C10 C 0.4183(5) 0.6075(3) 0.8174(3) 0.0218(8) Uani 1 1 d U . . 
H10A H 0.5207(5) 0.6771(3) 0.7992(3) 0.026 Uiso 1 1 d RU . . 
H10B H 0.3856(5) 0.6446(3) 0.8954(3) 0.026 Uiso 1 1 d RU . . 
C11 C 0.3390(5) 0.3905(3) 0.8560(4) 0.0199(8) Uani 1 1 d U . . 
H11A H 0.3053(5) 0.4269(3) 0.9340(4) 0.024 Uiso 1 1 d RU . . 
H11B H 0.3926(5) 0.3189(3) 0.8664(4) 0.024 Uiso 1 1 d RU . . 
C12 C 0.0703(5) 0.4451(3) 0.7425(4) 0.0203(8) Uani 1 1 d U . . 
H12A H 0.0328(5) 0.4807(3) 0.8193(4) 0.024 Uiso 1 1 d RU . . 
H12B H -0.0506(5) 0.4108(3) 0.6759(4) 0.024 Uiso 1 1 d RU . . 
C13 C 0.2821(5) 0.4970(3) 0.5916(3) 0.0185(8) Uani 1 1 d U . . 
H13A H 0.3834(5) 0.5654(3) 0.5713(3) 0.022 Uiso 1 1 d RU . . 
H13B H 0.1626(5) 0.4640(3) 0.5241(3) 0.022 Uiso 1 1 d RU . . 
C14 C 0.5428(5) 0.4407(4) 0.7092(4) 0.0206(8) Uani 1 1 d U . . 
H14A H 0.5982(5) 0.3693(4) 0.7175(4) 0.025 Uiso 1 1 d RU . . 
H14B H 0.6455(5) 0.5093(4) 0.6901(4) 0.025 Uiso 1 1 d RU . . 
C15 C 0.2048(5) 0.2838(3) 0.6368(4) 0.0205(8) Uani 1 1 d U . . 
H15A H 0.0837(5) 0.2503(3) 0.5705(4) 0.025 Uiso 1 1 d RU . . 
H15B H 0.2553(5) 0.2100(3) 0.6430(4) 0.025 Uiso 1 1 d RU . . 
N1 N 0.4963(4) 0.4969(3) 0.8290(3) 0.0201(7) Uani 1 1 d U . . 
N2 N 0.1507(4) 0.3363(3) 0.7558(3) 0.0174(7) Uani 1 1 d U . . 
N3 N 0.2279(4) 0.5555(3) 0.7128(3) 0.0186(7) Uani 1 1 d U . . 
D3 D 0.1812 0.6244 0.7068 0.022 Uiso 1 1 d R . . 
N4 N 0.3614(4) 0.3878(3) 0.6044(3) 0.0168(6) Uani 1 1 d U . . 
O1 O 0.9851(4) 0.7030(2) 0.6722(3) 0.0245(7) Uani 1 1 d U . . 
O2 O 1.2344(4) 0.8677(3) 0.8162(3) 0.0297(7) Uani 1 1 d U . . 
O3 O 1.0512(4) 1.2645(3) 1.0240(3) 0.0332(7) Uani 1 1 d U . . 
O4 O 0.7959(4) 1.3104(3) 0.9282(3) 0.0361(8) Uani 1 1 d U . . 
O5 O 0.3132(4) 0.9769(3) 0.5747(3) 0.0283(7) Uani 1 1 d U . . 
O6 O 0.3474(4) 0.7793(2) 0.5154(3) 0.0308(7) Uani 1 1 d U . . 
OW O 1.5562(8) 0.8932(5) 1.0056(5) 0.0303(13) Uani 0.50 1 d PDU . . 
D1 D 1.458(10) 0.881(7) 0.938(5) 0.04(3) Uiso 0.50 1 d PD . . 
D2 D 1.613(9) 0.976(3) 1.059(5) 0.02(2) Uiso 0.50 1 d PD . . 
 
loop_ 
 _atom_site_aniso_label 
 _atom_site_aniso_U_11 
 _atom_site_aniso_U_22 
 _atom_site_aniso_U_33 
 _atom_site_aniso_U_23 
 _atom_site_aniso_U_13 
 _atom_site_aniso_U_12 
C1 0.0146(16) 0.0175(16) 0.0238(19) 0.0052(14) 0.0034(14) 0.0069(13) 
C2 0.0122(15) 0.0147(15) 0.0218(18) 0.0058(13) 0.0036(14) 0.0050(13) 
C3 0.0129(16) 0.0150(16) 0.0209(18) 0.0037(13) 0.0017(14) 0.0011(12) 
C4 0.0202(17) 0.0084(14) 0.0225(18) 0.0005(13) 0.0072(15) 0.0016(13) 
N5 0.0272(17) 0.0138(14) 0.0265(18) -0.0005(13) 0.0084(14) 0.0011(12) 
C6 0.0190(17) 0.0109(15) 0.030(2) 0.0046(14) 0.0112(15) 0.0074(13) 
C7 0.0098(15) 0.0115(15) 0.0237(19) 0.0050(13) 0.0024(14) 0.0023(12) 
N6 0.0107(14) 0.0181(14) 0.0307(18) 0.0075(13) 0.0029(12) 0.0072(11) 
C9 0.0134(15) 0.0101(14) 0.0209(18) 0.0034(13) 0.0028(13) 0.0036(12) 
C10 0.0214(18) 0.0136(16) 0.0233(19) -0.0013(14) 0.0039(15) -0.0005(13) 
C11 0.0154(17) 0.0196(17) 0.0212(18) 0.0058(14) -0.0011(14) 0.0024(13) 
C12 0.0125(16) 0.0223(17) 0.028(2) 0.0063(15) 0.0058(14) 0.0079(13) 
C13 0.0200(17) 0.0169(16) 0.0214(18) 0.0036(14) 0.0037(14) 0.0120(14) 
C14 0.0069(15) 0.0243(18) 0.030(2) 0.0064(15) 0.0015(14) 0.0066(13) 
C15 0.0177(17) 0.0129(15) 0.0261(19) 0.0003(14) -0.0003(15) 0.0037(13) 
N1 0.0103(13) 0.0212(14) 0.0232(16) 0.0030(12) -0.0012(12) 0.0011(11) 
N2 0.0112(13) 0.0132(13) 0.0246(16) 0.0026(12) -0.0005(12) 0.0027(11) 
N3 0.0186(15) 0.0119(13) 0.0263(17) 0.0027(12) 0.0057(13) 0.0080(11) 
N4 0.0136(14) 0.0144(13) 0.0221(16) 0.0027(11) 0.0015(12) 0.0068(11) 
O1 0.0230(14) 0.0176(13) 0.0323(16) 0.0005(11) 0.0004(12) 0.0132(11) 
O2 0.0114(12) 0.0304(15) 0.0444(18) 0.0060(13) -0.0014(12) 0.0088(11) 
O3 0.0388(17) 0.0223(14) 0.0263(16) -0.0003(12) 0.0021(13) -0.0022(12) 
O4 0.0412(17) 0.0168(13) 0.049(2) -0.0032(13) 0.0122(15) 0.0146(13) 
O5 0.0234(14) 0.0271(14) 0.0409(18) 0.0128(13) 0.0024(13) 0.0179(12) 
O6 0.0171(13) 0.0195(13) 0.0438(18) -0.0053(12) -0.0078(12) 0.0049(11) 
OW 0.027(3) 0.021(3) 0.030(3) -0.004(2) -0.008(2) 0.002(2) 
 
_geom_special_details 
; 
 All esds (except the esd in the dihedral angle between two l.s. planes) 
 are estimated using the full covariance matrix.  The cell esds are taken 
 into account individually in the estimation of esds in distances, angles 
 and torsion angles; correlations between esds in cell parameters are only 
 used when they are defined by crystal symmetry.  An approximate (isotropic) 
 treatment of cell esds is used for estimating esds involving l.s. planes. 
; 
 
loop_ 
 _geom_bond_atom_site_label_1 
 _geom_bond_atom_site_label_2 
 _geom_bond_distance 
 _geom_bond_site_symmetry_2 
 _geom_bond_publ_flag 
C1 O2 1.248(4) . ? 
C1 O1 1.261(4) . ? 
C1 C2 1.521(4) . ? 
C2 C9 1.398(5) . ? 
C2 C3 1.403(5) . ? 
C3 H3A 0.9602 . ? 
C3 C4 1.390(4) . ? 
C4 C6 1.371(5) . ? 
C4 N5 1.474(4) . ? 
N5 O3 1.217(4) . ? 
N5 O4 1.234(4) . ? 
C6 H6A 0.9600 . ? 
C6 C7 1.380(5) . ? 
C7 C9 1.382(4) . ? 
C7 N6 1.474(4) . ? 
N6 O5 1.227(3) . ? 
N6 O6 1.229(4) . ? 
C9 H9A 0.9600 . ? 
C10 H10B 0.9598 . ? 
C10 H10A 0.9601 . ? 
C10 N1 1.453(4) . ? 
C10 N3 1.511(4) . ? 
C11 H11B 0.9600 . ? 
C11 H11A 0.9600 . ? 
C11 N1 1.467(5) . ? 
C11 N2 1.475(4) . ? 
C12 H12B 0.9600 . ? 
C12 H12A 0.9600 . ? 
C12 N2 1.449(4) . ? 
C12 N3 1.509(5) . ? 
C13 H13A 0.9600 . ? 
C13 H13B 0.9601 . ? 
C13 N4 1.448(4) . ? 
C13 N3 1.504(4) . ? 
C14 H14B 0.9598 . ? 
C14 H14A 0.9602 . ? 
C14 N1 1.459(5) . ? 
C14 N4 1.472(4) . ? 
C15 H15B 0.9599 . ? 
C15 H15A 0.9599 . ? 
C15 N2 1.465(5) . ? 
C15 N4 1.478(5) . ? 
N3 D3 0.8952 . ? 
OW D1 0.896(19) . ? 
OW D2 0.901(19) . ? 
 
loop_ 
 _geom_angle_atom_site_label_1 
 _geom_angle_atom_site_label_2 
 _geom_angle_atom_site_label_3 
 _geom_angle 
 _geom_angle_site_symmetry_1 
 _geom_angle_site_symmetry_3 
 _geom_angle_publ_flag 
O2 C1 O1 125.8(3) . . ? 
O2 C1 C2 118.5(3) . . ? 
O1 C1 C2 115.8(3) . . ? 
C9 C2 C3 119.6(3) . . ? 
C9 C2 C1 120.1(3) . . ? 
C3 C2 C1 120.3(3) . . ? 
H3A C3 C4 121.2(2) . . ? 
H3A C3 C2 120.69(18) . . ? 
C4 C3 C2 118.1(3) . . ? 
C6 C4 C3 124.0(3) . . ? 
C6 C4 N5 117.8(3) . . ? 
C3 C4 N5 118.2(3) . . ? 
O3 N5 O4 123.8(3) . . ? 
O3 N5 C4 118.5(3) . . ? 
O4 N5 C4 117.6(3) . . ? 
H6A C6 C4 122.04(18) . . ? 
H6A C6 C7 121.96(18) . . ? 
C4 C6 C7 116.0(3) . . ? 
C6 C7 C9 123.7(3) . . ? 
C6 C7 N6 117.8(3) . . ? 
C9 C7 N6 118.5(3) . . ? 
O5 N6 O6 123.8(3) . . ? 
O5 N6 C7 118.1(3) . . ? 
O6 N6 C7 118.2(2) . . ? 
H9A C9 C7 121.0(2) . . ? 
H9A C9 C2 120.37(18) . . ? 
C7 C9 C2 118.6(3) . . ? 
H10B C10 H10A 108.4 . . ? 
H10B C10 N1 109.6(2) . . ? 
H10A C10 N1 109.90(19) . . ? 
H10B C10 N3 109.70(18) . . ? 
H10A C10 N3 110.18(19) . . ? 
N1 C10 N3 109.1(3) . . ? 
H11B C11 H11A 108.0 . . ? 
H11B C11 N1 109.51(17) . . ? 
H11A C11 N1 108.67(19) . . ? 
H11B C11 N2 109.51(16) . . ? 
H11A C11 N2 108.74(19) . . ? 
N1 C11 N2 112.3(3) . . ? 
H12B C12 H12A 108.2 . . ? 
H12B C12 N2 109.21(18) . . ? 
H12A C12 N2 109.6(2) . . ? 
H12B C12 N3 109.74(18) . . ? 
H12A C12 N3 109.65(18) . . ? 
N2 C12 N3 110.5(3) . . ? 
H13A C13 H13B 108.3 . . ? 
H13A C13 N4 109.50(19) . . ? 
H13B C13 N4 109.49(18) . . ? 
H13A C13 N3 109.79(18) . . ? 
H13B C13 N3 109.78(17) . . ? 
N4 C13 N3 109.9(3) . . ? 
H14B C14 H14A 107.9 . . ? 
H14B C14 N1 108.98(19) . . ? 
H14A C14 N1 108.99(18) . . ? 
H14B C14 N4 109.22(19) . . ? 
H14A C14 N4 109.03(16) . . ? 
N1 C14 N4 112.6(3) . . ? 
H15B C15 H15A 108.0 . . ? 
H15B C15 N2 109.37(17) . . ? 
H15A C15 N2 108.92(17) . . ? 
H15B C15 N4 109.19(16) . . ? 
H15A C15 N4 109.15(18) . . ? 
N2 C15 N4 112.2(3) . . ? 
C10 N1 C14 108.8(3) . . ? 
C10 N1 C11 109.7(3) . . ? 
C14 N1 C11 108.0(3) . . ? 
C12 N2 C15 108.1(3) . . ? 
C12 N2 C11 108.8(3) . . ? 
C15 N2 C11 108.3(3) . . ? 
C13 N3 C12 108.4(3) . . ? 
C13 N3 C10 108.9(3) . . ? 
C12 N3 C10 109.2(3) . . ? 
C13 N3 D3 110.9 . . ? 
C12 N3 D3 111.2 . . ? 
C10 N3 D3 108.2 . . ? 
C13 N4 C14 108.4(3) . . ? 
C13 N4 C15 108.9(3) . . ? 
C14 N4 C15 108.2(3) . . ? 
D1 OW D2 119(3) . . ? 
 
_diffrn_measured_fraction_theta_max    0.978 
_diffrn_reflns_theta_full              27.47 
_diffrn_measured_fraction_theta_full   0.978 
_refine_diff_density_max    0.857 
_refine_diff_density_min   -0.916 
_refine_diff_density_rms    0.244 
